# Supplementary material for: Understanding the catalytic performances of metal-doped Ta2O5 catalysts for acidic oxygen evolution reaction with computations
Source: Royal Society of Chemistry journal article supplement (doi:10.1039/d4sc03554b), 2024-01-01
Supplement: d4sc03554b1.pdf [file d4sc03554b1.pdf]

## Supporting Information for

### Understanding the catalytic performances of metal-doped Ta<sub>2</sub>O<sub>5</sub> catalysts for acidic oxygen evolution reaction with computations

Congcong Han,<sup>1,2</sup> Tao Wang<sup>2,3,4\*</sup>

<sup>1</sup>Department of Chemistry, Zhejiang University, Hangzhou 310058, Zhejiang Province, China.

<sup>2</sup>Center of Artificial Photosynthesis for Solar Fuels and Department of Chemistry, School of Science and Research Center for Industries of the Future, Westlake University, 600 Dunny Road, Hangzhou 310030, Zhejiang Province, China.

<sup>3</sup>Institute of Natural Sciences, Westlake Institute for Advanced Study, 18 Shilongshan Road, Hangzhou 310024, Zhejiang Province, China.

<sup>4</sup>Division of Solar Energy Conversion and Catalysis at Westlake University, Zhejiang Baima Lake Laboratory Co., Ltd, Hangzhou 310000, Zhejiang, China.

Email: [twang@westlake.edu.cn](mailto:twang@westlake.edu.cn)

#### CONTENTS

**Supporting Note 1: Reaction mechanism of OER**

**Supporting Note 2: Stability of the M-doped surface**

**Supporting Note 3: Surface Pourbaix diagrams**

**Table S1:** The total energies (eV) of possible doping positions M-Ta<sub>15</sub>O<sub>40</sub> and M-Ta<sub>15</sub>O<sub>42</sub>.

**Table S2:** Formation energy and cohesive energy of M-Ta<sub>15</sub>O<sub>40</sub> and M-Ta<sub>15</sub>O<sub>42</sub>.

**Table S3:**  $\Delta G$  of each step during OER and theoretical overpotential on the M-Ta<sub>15</sub>O<sub>40</sub>.

**Table S4:**  $\Delta G$  of each step during OER and theoretical overpotential on the M-Ta<sub>15</sub>O<sub>42</sub>.

**Table S5:** Adsorption energies of the various intermediates on the M-doped surfaces.

**Table S6:** Gibbs free energy of intermediate species of M-doped systems determined by surface Pourbaix diagrams.

**Figure S1:** The free energy diagram of OER on the Pt(111) surface.

**Figure S2-S14:** Surface Pourbaix diagrams of M-doped systems.

## Supporting Note 1: Reaction mechanism of OER

In the water-splitting reaction, hydrogen evolution reaction(HER) and oxygen evolution reaction(OER) occur at the cathode and anode, respectively. The catalytic activities of catalysts for OER are evaluated through the determination of the theoretical overpotential  $\eta_{\text{OER}}$  and the potential-determining step (PDS). The classic adsorbate evolution mechanism(AEM) used in this work involved  $^*\text{O}$ ,  $^*\text{OH}$ , and  $^*\text{OOH}$  as key reaction intermediates.<sup>1,2</sup> Specifically, the four proton and electron transfer steps under acidic conditions for the  $4e^-$  OER mechanism are:

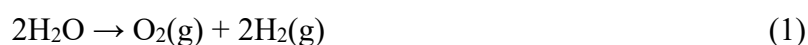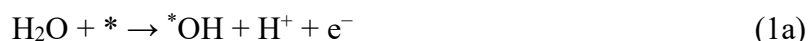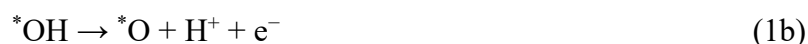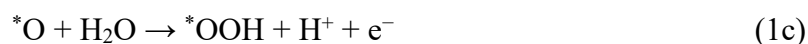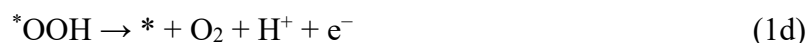

Where  $*$ ,  $^*\text{OH}$ ,  $^*\text{O}$ ,  $^*\text{OOH}$  represents the clean surface and hydroxyl, oxygen, and hydroperoxide intermediates on the surface, respectively.<sup>3</sup>

The Gibbs free energy change for steps 1a-1d can be expressed as 2a-2d.

$$\Delta G_1 = \Delta G_{^*\text{OH}} - \Delta G_{^*\text{H}_2\text{O}(\text{l})} + \Delta G_{\text{H}^+}(\text{pH}) - eU \quad (2\text{a})$$

$$\Delta G_2 = \Delta G_{^*\text{O}} - \Delta G_{^*\text{OH}} + \Delta G_{\text{H}^+}(\text{pH}) - eU \quad (2\text{b})$$

$$\Delta G_3 = \Delta G_{^*\text{OOH}} - \Delta G_{^*\text{O}} + \Delta G_{\text{H}^+}(\text{pH}) - eU \quad (2\text{c})$$

$$\Delta G_4 = 4.92[\text{eV}] - \Delta G_{^*\text{OOH}} + \Delta G_{\text{H}^+}(\text{pH}) - eU \quad (2\text{d})$$

The free energy change of the protons relative to a specified electrode at non-zero pH is described by the Nernst equation as  $\Delta G_{\text{H}^+}(\text{pH}) = -k_{\text{B}}T\ln[\text{H}^+] = k_{\text{B}}T\ln(10) \times \text{pH}$ . The computational hydrogen electrode (CHE) is used to express the chemical potential of the proton-electron pair  $\text{H}^+ + e^-$ , which correlates it with the chemical potential of the gas-phase  $\text{H}_2$  molecule based on the equilibrium  $\mu[\text{H}^+] + \mu[e^-] = 1/2\mu[\text{H}_2(\text{g})]$  at 0  $V_{\text{SHE}}$  (Where SHE is the standard hydrogen electrode).<sup>4</sup> To avoid the use of  $\text{O}_2$  electronic energy, which is difficult to determine accurately within standard GGA-DFT, the experimental free energy of  $2\text{H}_2\text{O}(\text{l}) \rightarrow \text{O}_2(\text{g}) + 2\text{H}_2(\text{g})$ ,  $\Delta G = 4.92 \text{ eV}$  is used. The Gibbs free energies of reaction 2a-2b depend on the free energies of the reaction

intermediates ( $\Delta G_{*OH}$ ,  $\Delta G_{*O}$ ,  $\Delta G_{*OOH}$ ) calculated relative to  $H_2O(g)$  and  $H_2(g)$  at  $U = 0$  V and standard conditions ( $T = 298.15$  K and  $p = 1$  bar, and  $pH = 0$ ). The binding energies of  $*O$ ,  $*OH$ ,  $*OOH$  on the different surface terminations, including M-termination ( $Ta_{16}O_{40}$  and M- $Ta_{15}O_{40}$ ), O-termination ( $Ta_{16}O_{42}$  and M- $Ta_{15}O_{42}$ ), and the surface determined by surface Pourbaix diagrams, were systematically calculated with DFT. Multiple sites for  $*O$ ,  $*OH$ ,  $*OOH$  on various surfaces were considered, and the most stable configurations were used to determine Gibbs free energies. The Gibbs free energy differences of these intermediates include zero point energy (ZPE) and entropic corrections according to  $\Delta G_i = \Delta E_i + \Delta ZPE - T\Delta S_i$  and energy differences  $\Delta E_i$  calculated relative to  $H_2O$  and  $H_2$  (at  $U = 0$  and  $pH = 0$ ) as:

$$\Delta E_{*OH} = E(*OH) - E(*) - [E(H_2O) - \frac{1}{2}E(H_2)] \quad (3a)$$

$$\Delta E_{*O} = E(*O) - E(*) - [E(H_2O) - E(H_2)] \quad (3b)$$

$$\Delta E_{*OOH} = E(*OOH) - E(*) - [2E(H_2O) - \frac{3}{2}E(H_2)] \quad (3c)$$

The theoretical overpotential is then defined as:

$$\eta = \max[\Delta G_1, \Delta G_2, \Delta G_3, \Delta G_4]/e - 1.23 \quad (4)$$

Note that the theoretical overpotential given by eq. 4 is only a thermodynamic quantity, but it has been found to scale well with measured overpotentials, which depend on the concentration of active sites and the current density.

## Supporting Note 2: Stability of the M-doped surface

The formation energy ( $E_f$ ) is defined in eq.5 as  $E_f = E_{M-doped} + E_{Ta} - E_{slab} - E_M$ , where a more negative value of  $E_f$  indicates a relatively higher synthetic feasibility. Here,  $E_{M-doped}$  and  $E_{slab}$  represent the electronic energy of the doped and undoped systems, respectively.  $E_M$  is the energy of a dopant metal atom in its bulk. Regarding the energy of the substituted Ta atom ( $E_{Ta}$ ), we used its energy in bulk  $Ta_2O_5$  ( $E_{Ta} = 1/2 \times (E_{Ta_2O_5} - 5E_O)$ ), where  $E_{Ta_2O_5}$  is the electronic energy of stoichiometric bulk  $Ta_2O_5$ , and  $E_O$  is referred to  $H_2O/H_2$  ( $E_O = E_{H_2O} - E_{H_2}$ ).

The cohesive energy ( $E_{coh}$ ) is defined in eq. 6 as  $E_{coh} = (n_M E_M + n_{Ta} E_{Ta} + n_O E_O - E_{M-doped}) / (n_M + n_{Ta} + n_O)$ , where  $n_M$ ,  $n_{Ta}$ , and  $n_O$  denote the numbers of dopant, Ta, and

O in the systems.

### Supporting Note 3: Surface Pourbaix diagrams

We construct the surface Pourbaix diagram to identify the electrochemically most stable structures for undoped and M-doped Ta<sub>2</sub>O<sub>5</sub>(100) at a range of potentials and pH values. It is noted that Ta<sub>2</sub>O<sub>5</sub> bulk is stable in acid and alkaline environments. The surface Pourbaix diagrams are constructed by eq. 7a-7g, where  $E(n^*O + y^*OH)$  is the total energy of a surface with  $n^*O$  and  $y^*OH$ ,  $E_{slab}$  is the total energy of the bare surface,  $E(H_2)$  is the total energy for gas phase hydrogen molecule, and  $E(H_2O)$  is the total energy of gas phase water molecule.<sup>5</sup>

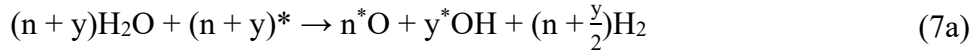

$$\Delta E_{total} = E(n^*O + y^*OH) + (n + \frac{y}{2})E(H_2) - [(n + y)E(H_2O) + E_{slab}] \quad (7b)$$

$$\Delta E_{ZPE} = E_{ZPE}(n^*O + y^*OH) + (n + \frac{y}{2})E_{ZPE}(H_2) - (n + y)E_{ZPE}(H_2O) \quad (7c)$$

$$T\Delta S = TS(n^*O + y^*OH) + (n + \frac{y}{2})TS(H_2) - (n + y)TS(H_2O) \quad (7d)$$

$$\mu(H^+) + \mu(e^-) = G(H^+) + G(e^-) = \frac{1}{2}G(H_2) \quad (7e)$$

$$\Delta G(0,0) = \Delta G = \Delta E_{total} + \Delta E_{ZPE} - T\Delta S \quad (7f)$$

$$\Delta G(pH,U) = \Delta G(0,0) + \Delta G_{H^+}(pH) - eU \quad (7g)$$

**Table S1.** The total energies (eV) of possible doping positions of M-Ta<sub>15</sub>O<sub>40</sub> and M-Ta<sub>15</sub>O<sub>42</sub>

| Doping position                  | M-Ta <sub>15</sub> O <sub>40</sub> |                                  | M-Ta <sub>15</sub> O <sub>42</sub> |                  |
|----------------------------------|------------------------------------|----------------------------------|------------------------------------|------------------|
|                                  | 1                                  | 2                                | 1                                  | 2                |
| Ti                               | -507.9009                          | <b>-507.9494</b>                 | -516.3548                          | <b>-516.6749</b> |
| V                                | -506.7620                          | <b>-506.9128</b>                 | <b>-518.6498</b>                   | -517.5882        |
| Cr                               | -505.8880                          | <b>-506.0495</b>                 | -516.6138                          | <b>-516.9331</b> |
| Mn                               | -505.0278                          | <b>-505.3196</b>                 | -514.1780                          | <b>-514.9431</b> |
| Fe                               | -503.1648                          | <b>-503.2061</b>                 | -511.0734                          | <b>-511.9281</b> |
| Co                               | -500.4849                          | <b>-500.6487</b>                 | -508.4005                          | <b>-509.2293</b> |
| Ni                               | -497.8923                          | <b>-498.0494</b>                 | -505.4779                          | <b>-505.8334</b> |
| Zr                               | <b>-510.4981</b>                   | -510.4699                        | <b>-519.1330</b>                   | -518.7411        |
| Nb                               | <b>-508.6534</b>                   | -508.5749                        | -519.8107                          | <b>-519.8669</b> |
| Mo                               | -506.8909                          | <b>-507.0098</b>                 | -519.4780                          | <b>-520.1699</b> |
| Ru                               | -502.3722                          | <b>-502.8531</b>                 | -513.0474                          | <b>-514.1804</b> |
| Sn                               | -500.1086                          | <b>-500.3193</b>                 | <b>-508.5416</b>                   | -508.4985        |
| Sb                               | -500.0948                          | <b>-500.2384</b>                 | -509.0633                          | <b>-509.3030</b> |
| Ir                               | -500.8445                          | <b>-501.4327</b>                 | -511.1992                          | <b>-512.6152</b> |
| Ta <sub>16</sub> O <sub>40</sub> | -511.1941                          | Ta <sub>16</sub> O <sub>42</sub> | -522.4311                          |                  |

**Note:** 1 represents the left doping site, 2 means the right doping site. **Bold numbers** represent doping site with the lowest energy.

**Table S2.** Formation energy ( $E_f$ ), cohesive energy ( $E_{\text{coh}}$ ) of M-Ta<sub>15</sub>O<sub>40</sub> and M-Ta<sub>15</sub>O<sub>42</sub>

| M                                | $E_f$ (eV) | $E_{\text{coh}}$<br>(eV/atom) | M                                | $E_f$ (eV) | $E_{\text{coh}}$<br>(eV/atom) |
|----------------------------------|------------|-------------------------------|----------------------------------|------------|-------------------------------|
| Ti                               | -4.032     | 0.757                         | Ti                               | -1.520     | 0.633                         |
| V                                | -1.908     | 0.719                         | V                                | -2.408     | 0.649                         |
| Cr                               | -0.544     | 0.695                         | Cr                               | -0.191     | 0.611                         |
| Mn                               | -0.317     | 0.691                         | Mn                               | 1.297      | 0.585                         |
| Fe                               | 1.106      | 0.665                         | Fe                               | 3.621      | 0.545                         |
| Co                               | 2.425      | 0.642                         | Co                               | 5.082      | 0.520                         |
| Ni                               | 3.458      | 0.623                         | Ni                               | 6.911      | 0.488                         |
| Zr                               | -5.840     | 0.789                         | Zr                               | -3.238     | 0.663                         |
| Nb                               | -2.510     | 0.730                         | Nb                               | -2.487     | 0.650                         |
| Mo                               | -0.089     | 0.687                         | Mo                               | -2.012     | 0.642                         |
| Ru                               | 2.315      | 0.644                         | Ru                               | 2.225      | 0.569                         |
| Sn                               | -0.253     | 0.690                         | Sn                               | 2.762      | 0.560                         |
| Sb                               | 0.104      | 0.683                         | Sb                               | 2.276      | 0.568                         |
| Ir                               | 3.333      | 0.626                         | Ir                               | 3.387      | 0.549                         |
| Ta <sub>16</sub> O <sub>40</sub> | -          | 0.744                         | Ta <sub>16</sub> O <sub>42</sub> | -          | 0.664                         |

**Table S3.**  $\Delta G$  (eV) of each step during OER and theoretical overpotential on the M-Ta<sub>15</sub>O<sub>40</sub> at standard conditions.

| M                                | $\Delta G^{*OH}$ | $\Delta G^{*O}$ | $\Delta G^{*OOH}$ | $\Delta G^{*O} - \Delta G^{*OH}$ | $\eta$ (V) | PDS                   |
|----------------------------------|------------------|-----------------|-------------------|----------------------------------|------------|-----------------------|
| Ti                               | -0.022           | 1.920           | 3.517             | 1.942                            | 0.712      | *OH $\rightarrow$ *O  |
| V                                | -0.669           | 0.186           | 2.766             | 0.855                            | 1.350      | *O $\rightarrow$ *OOH |
| Cr                               | -0.238           | 0.710           | 3.250             | 0.946                            | 1.311      | *O $\rightarrow$ *OOH |
| Mn                               | 0.475            | 1.956           | 3.950             | 1.482                            | 0.766      | *O $\rightarrow$ *OOH |
| Fe                               | 0.236            | 2.154           | 3.968             | 1.918                            | 0.688      | *OH $\rightarrow$ *O  |
| Co                               | 0.171            | 2.122           | 3.978             | 1.951                            | 0.721      | *OH $\rightarrow$ *O  |
| Ni                               | 0.271            | 2.233           | 3.728             | 1.963                            | 0.733      | *OH $\rightarrow$ *O  |
| Zr                               | -0.196           | 1.815           | 3.359             | 2.011                            | 0.781      | *OH $\rightarrow$ *O  |
| Nb                               | -1.108           | -0.448          | 2.414             | 0.660                            | 1.632      | *O $\rightarrow$ *OOH |
| Mo                               | -0.870           | -0.586          | 2.611             | 0.285                            | 1.967      | *O $\rightarrow$ *OOH |
| Ru                               | 0.349            | 1.171           | 3.408             | 0.822                            | 1.007      | *O $\rightarrow$ *OOH |
| Sn                               | 0.129            | 2.325           | 3.584             | 2.196                            | 0.966      | *OH $\rightarrow$ *O  |
| Sb                               | 0.710            | 1.513           | 4.229             | 0.803                            | 1.487      | *O $\rightarrow$ *OOH |
| Ir                               | 0.214            | 1.214           | 3.201             | 0.999                            | 0.758      | *O $\rightarrow$ *OOH |
| Ta <sub>16</sub> O <sub>40</sub> | -1.236           | -0.599          | 2.287             | 0.637                            | 1.656      | *O $\rightarrow$ *OOH |
| Pt(111)                          | 0.999            | 1.393           | 3.852             | 0.394                            | 1.229      | *O $\rightarrow$ *OOH |

**Table S4.**  $\Delta G$  (eV) of each step during OER and theoretical overpotential on the M-Ta<sub>15</sub>O<sub>42</sub> at standard conditions.

| M                                | $\Delta G^{*OH}$ | $\Delta G^{*O}$ | $\Delta G^{*OOH}$ | $\Delta G^{*O} - \Delta G^{*OH}$ | $\eta$ (V) | PDS                  |
|----------------------------------|------------------|-----------------|-------------------|----------------------------------|------------|----------------------|
| Ti                               | 2.426            | 4.485           | 5.286             | 2.059                            | 1.196      | * $\rightarrow$ *OH  |
| V                                | 3.090            | 5.493           | 6.121             | 2.402                            | 1.860      | * $\rightarrow$ *OH  |
| Cr                               | 2.081            | 4.183           | 4.806             | 2.101                            | 0.871      | *OH $\rightarrow$ *O |
| Mn                               | 2.297            | 4.449           | 4.783             | 2.152                            | 1.067      | * $\rightarrow$ *OH  |
| Fe                               | 2.060            | 4.163           | 4.755             | 2.103                            | 0.873      | *OH $\rightarrow$ *O |
| Co                               | 2.081            | 4.163           | 4.806             | 2.082                            | 0.852      | *OH $\rightarrow$ *O |
| Ni                               | 2.308            | 4.469           | 4.831             | 2.161                            | 1.078      | * $\rightarrow$ *OH  |
| Zr                               | 2.248            | 4.353           | 4.694             | 2.104                            | 1.018      | * $\rightarrow$ *OH  |
| Nb                               | 2.137            | 3.988           | 4.790             | 1.852                            | 0.907      | * $\rightarrow$ *OH  |
| Mo                               | 1.974            | 4.113           | 4.786             | 2.138                            | 0.908      | *OH $\rightarrow$ *O |
| Ru                               | 1.955            | 4.109           | 4.805             | 2.154                            | 0.924      | *OH $\rightarrow$ *O |
| Sn                               | 2.088            | 4.249           | 4.826             | 2.161                            | 0.931      | *OH $\rightarrow$ *O |
| Sb                               | 1.913            | 3.868           | 4.744             | 1.954                            | 0.724      | *OH $\rightarrow$ *O |
| Ir                               | 1.518            | 3.830           | 4.692             | 2.312                            | 1.082      | *OH $\rightarrow$ *O |
| Ta <sub>16</sub> O <sub>42</sub> | 1.995            | 4.006           | 4.784             | 2.012                            | 0.782      | *OH $\rightarrow$ *O |

**Table S5.** Adsorption energies (eV) of the various intermediates considered on the M-doped surfaces (only the most stable configurations were summarized).

| Metal                          | Clean surface | 1/4 ML *O | 1/4ML *OH | 1/2 ML *OH | 1/4 ML *O + 1/4 ML *OH |
|--------------------------------|---------------|-----------|-----------|------------|------------------------|
| Ti                             | 0             | 1.956     | 0.113     | 1.273      | 2.908                  |
| V                              | 0             | 0.223     | -0.267    | -0.607     | 1.750                  |
| Cr                             | 0             | 0.746     | -0.187    | 0.089      | 1.723                  |
| Mn                             | 0             | 1.993     | 0.566     | 1.351      | 3.433                  |
| Fe                             | 0             | 2.122     | 0.356     | 0.631      | 3.896                  |
| Co                             | 0             | 2.211     | 0.300     | 1.433      | 4.037                  |
| Ni                             | 0             | 2.270     | 0.305     | 1.691      | 3.909                  |
| Zr                             | 0             | 1.871     | -0.157    | 1.159      | 3.432                  |
| Nb                             | 0             | -0.566    | -1.068    | -1.285     | 0.969                  |
| Mo                             | 0             | -0.973    | -0.832    | -1.178     | -0.800                 |
| Ru                             | 0             | 0.910     | 0.240     | 0.580      | 1.886                  |
| Sn                             | 0             | 2.196     | 0.191     | 1.252      | 3.959                  |
| Sb                             | 0             | 1.549     | 0.750     | 0.503      | 3.022                  |
| Ta <sub>2</sub> O <sub>5</sub> | 0             | -0.563    | -1.165    | -1.304     | 0.976                  |

**Table S6:**  $\Delta G$  (eV) of intermediate species on the most stable surface state of M-doped systems under working conditions as determined by surface Pourbaix diagrams.

| Metal                          | $\Delta G_{*OH}$ | $\Delta G_{*O}$ | $\Delta G_{*OOH}$ | $\Delta G_{*O} - \Delta G_{*OH}$ | $\eta(V)$ | PDS                   |
|--------------------------------|------------------|-----------------|-------------------|----------------------------------|-----------|-----------------------|
| Ti                             | 1.560            | 3.745           | 4.595             | 2.185                            | 0.955     | *OH $\rightarrow$ *O  |
| V                              | 0.078            | 2.476           | 3.654             | 2.397                            | 1.167     | *OH $\rightarrow$ *O  |
| Cr                             | 0.704            | 3.006           | 4.266             | 2.302                            | 1.072     | *OH $\rightarrow$ *O  |
| Mn                             | 1.171            | 3.271           | 4.282             | 2.099                            | 0.869     | *OH $\rightarrow$ *O  |
| Fe                             | 1.230            | 3.555           | 4.092             | 2.324                            | 1.094     | *OH $\rightarrow$ *O  |
| Co                             | 1.141            | 3.597           | 4.525             | 2.454                            | 1.224     | *OH $\rightarrow$ *O  |
| Ni                             | 1.298            | 3.480           | 4.130             | 2.182                            | 0.951     | *OH $\rightarrow$ *O  |
| Zr                             | 1.515            | 3.579           | 4.310             | 2.063                            | 0.833     | *OH $\rightarrow$ *O  |
| Nb                             | 0.332            | 2.173           | 3.389             | 1.840                            | 0.610     | *OH $\rightarrow$ *O  |
| Mo                             | 0.133            | 2.196           | 3.553             | 2.063                            | 0.833     | *OH $\rightarrow$ *O  |
| Ru                             | 0.940            | 2.135           | 3.980             | 1.195                            | 0.614     | *O $\rightarrow$ *OOH |
| Sn                             | 1.461            | 3.728           | 4.528             | 2.266                            | 1.036     | *OH $\rightarrow$ *O  |
| Sb                             | -0.075           | 2.778           | 3.362             | 2.853                            | 1.623     | *OH $\rightarrow$ *O  |
| Ir                             | 0.760            | 2.078           | 3.634             | 1.318                            | 0.325     | *O $\rightarrow$ *OOH |
| Ta <sub>2</sub> O <sub>5</sub> | -0.049           | 1.910           | 3.290             | 1.959                            | 0.729     | *OH $\rightarrow$ *O  |

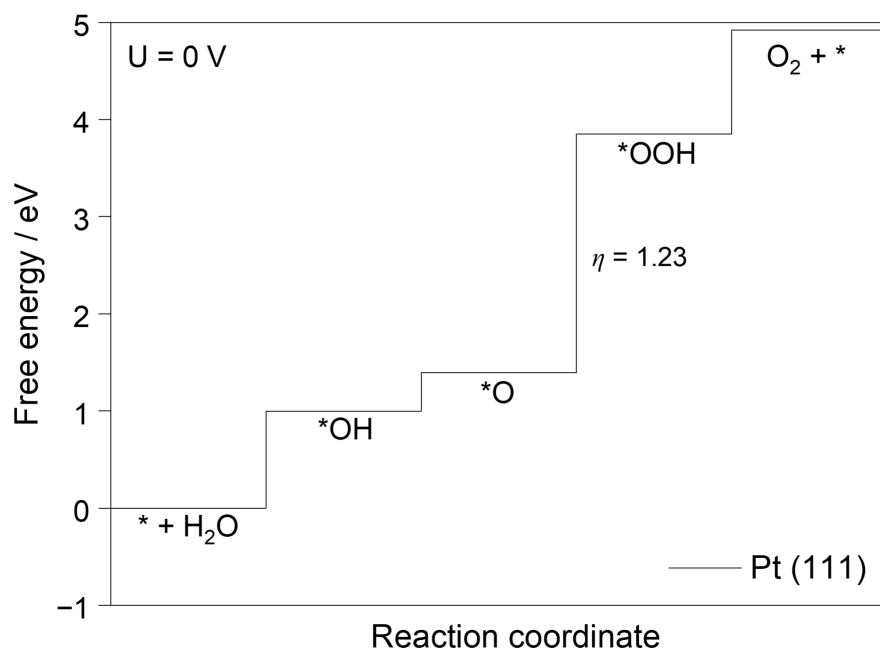

**Figure S1.** The free energy diagram of OER on the Pt(111) surface



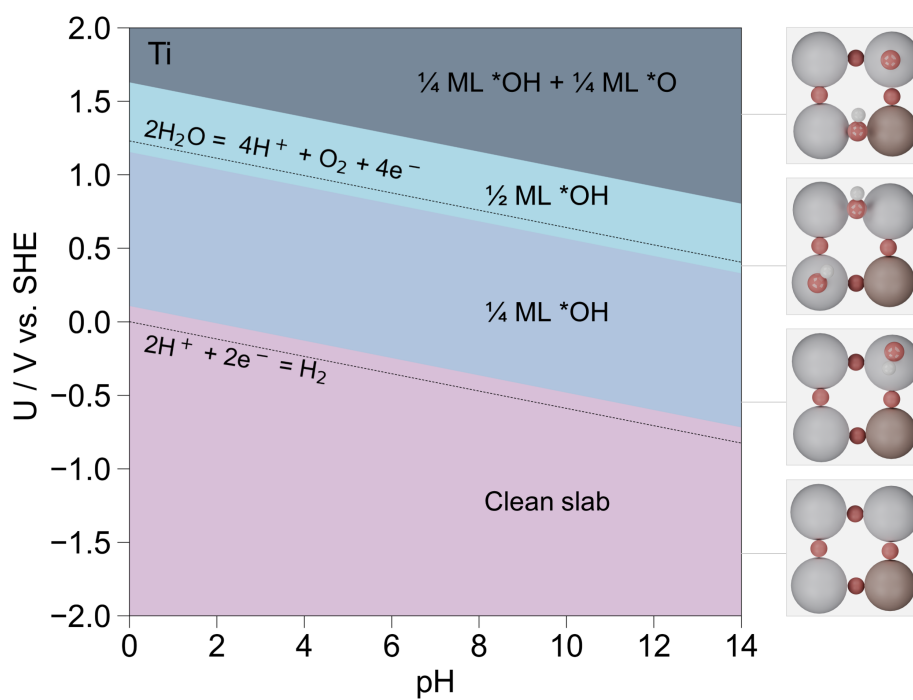

**Figure S2.** Surface Pourbaix diagram of Ti-doped Ta<sub>2</sub>O<sub>5</sub>(100)

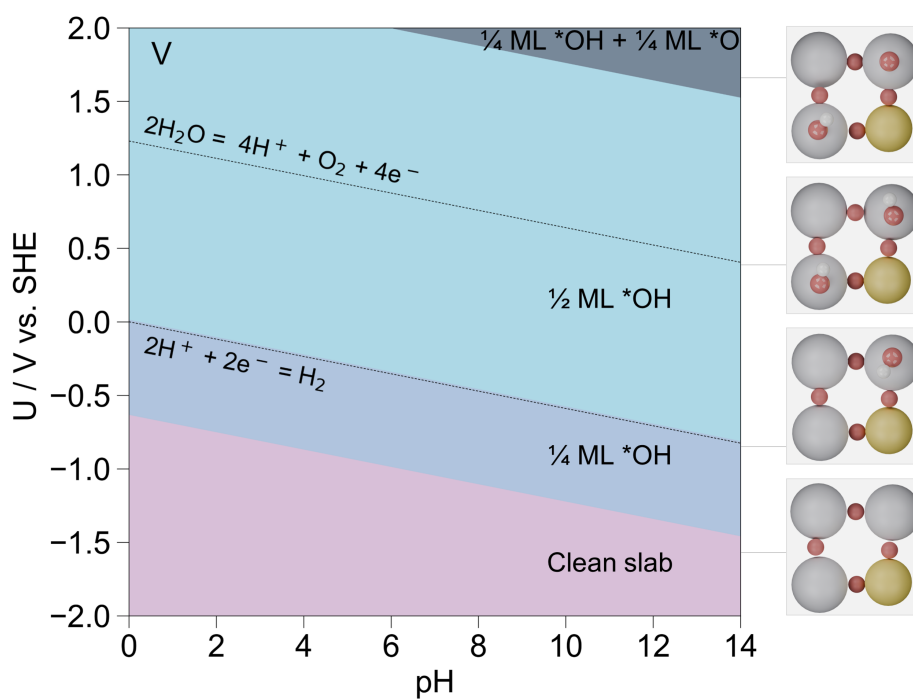

**Figure S3.** Surface Pourbaix diagram of V-doped Ta<sub>2</sub>O<sub>5</sub>(100)

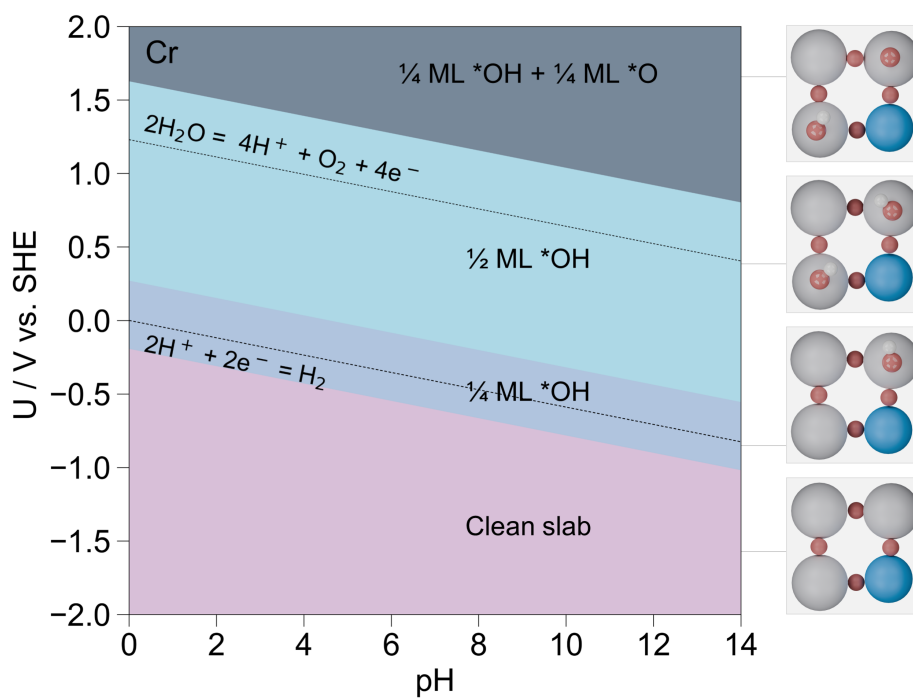

**Figure S4.** Surface Pourbaix diagram of Cr-doped Ta<sub>2</sub>O<sub>5</sub>(100)

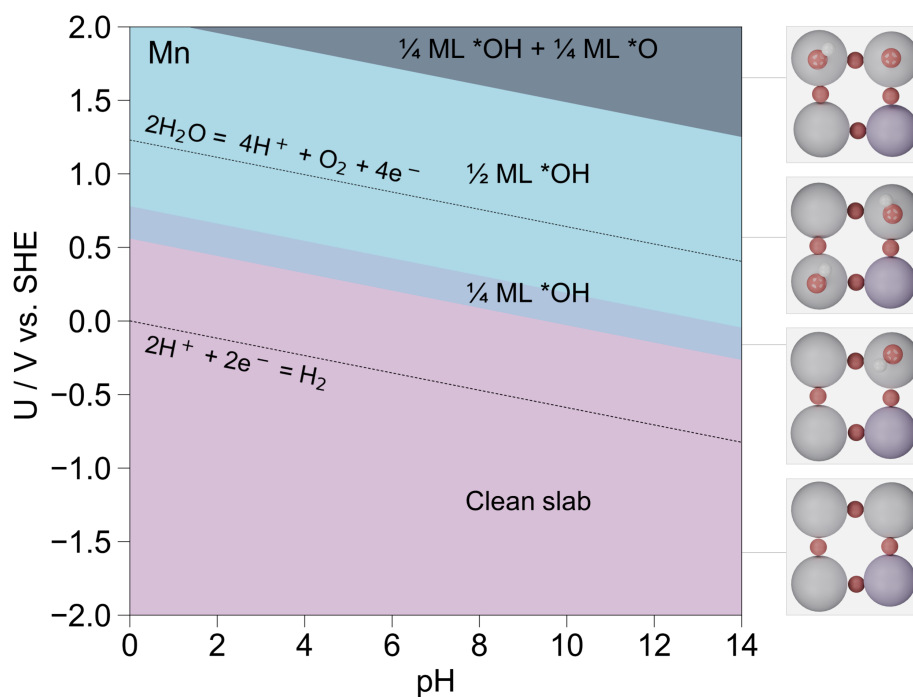

**Figure S5.** Surface Pourbaix diagram of Mn-doped Ta<sub>2</sub>O<sub>5</sub>(100)

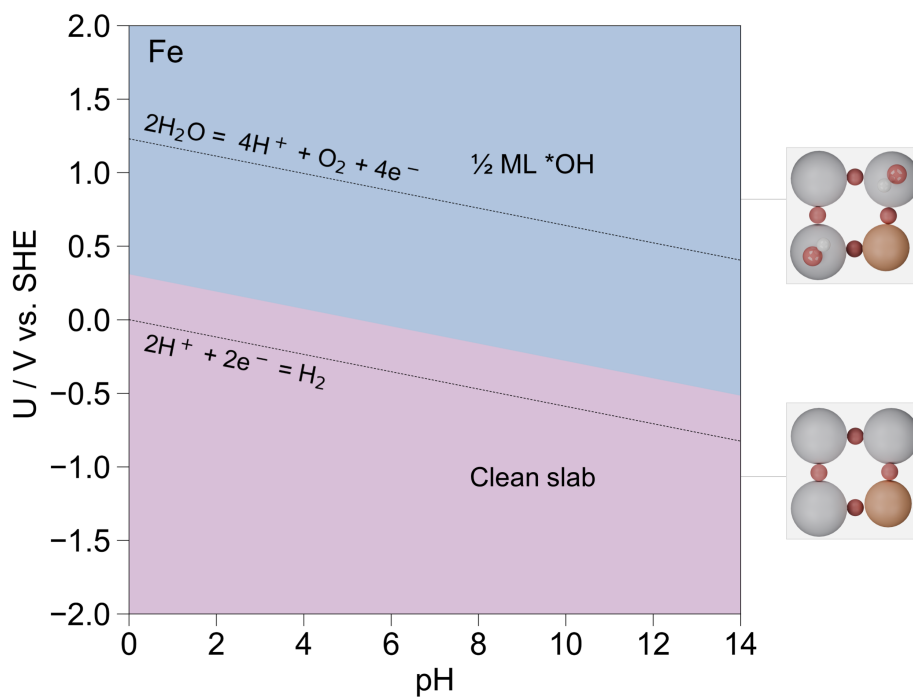

**Figure S6.** Surface Pourbaix diagram of Fe-doped Ta<sub>2</sub>O<sub>5</sub>(100)

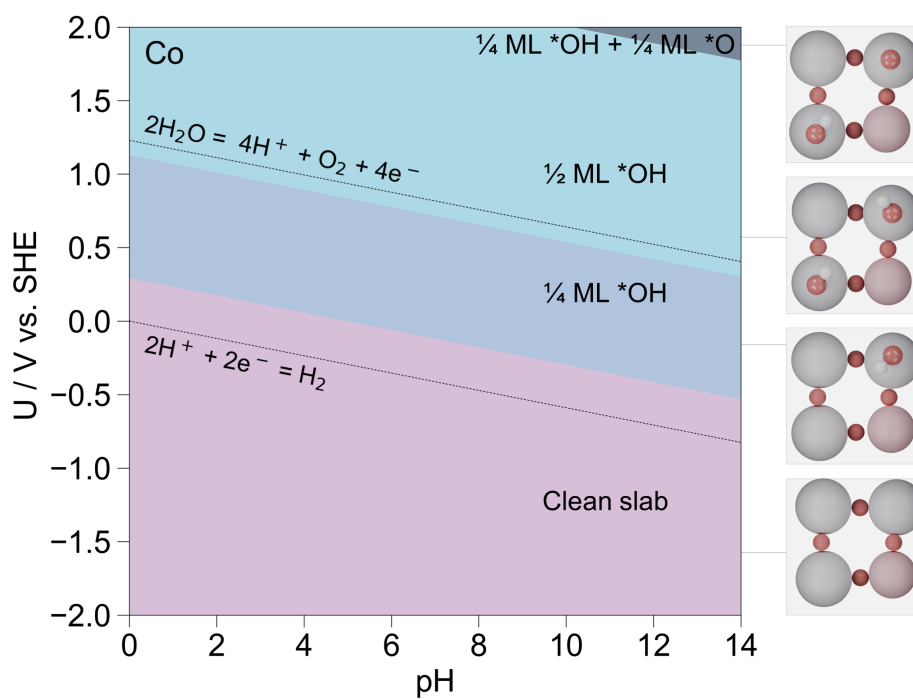

**Figure S7.** Surface Pourbaix diagram of Co-doped Ta<sub>2</sub>O<sub>5</sub>(100)

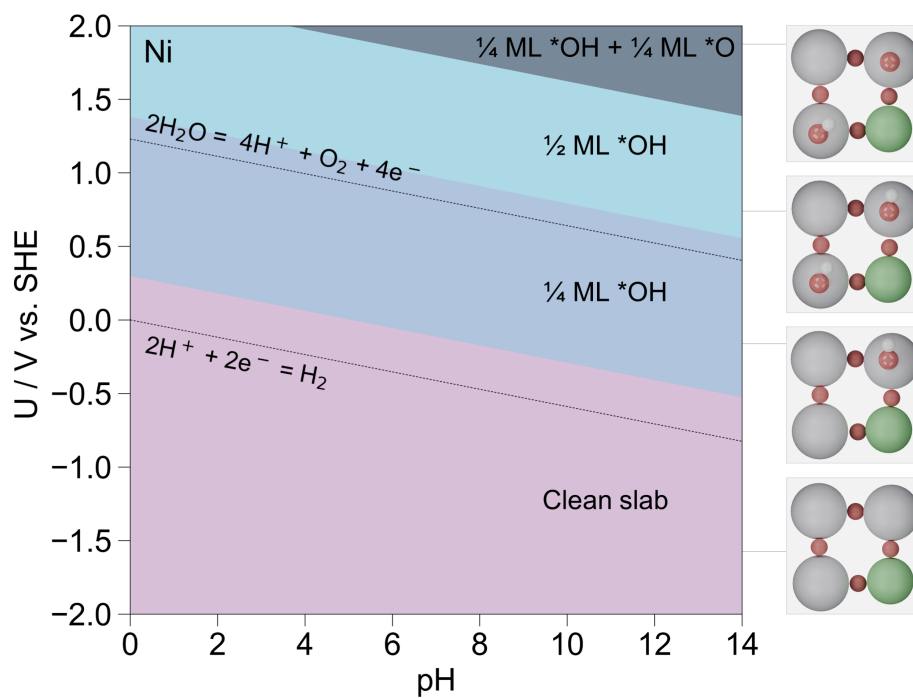

**Figure S8.** Surface Pourbaix diagram of Ni-doped Ta<sub>2</sub>O<sub>5</sub>(100)

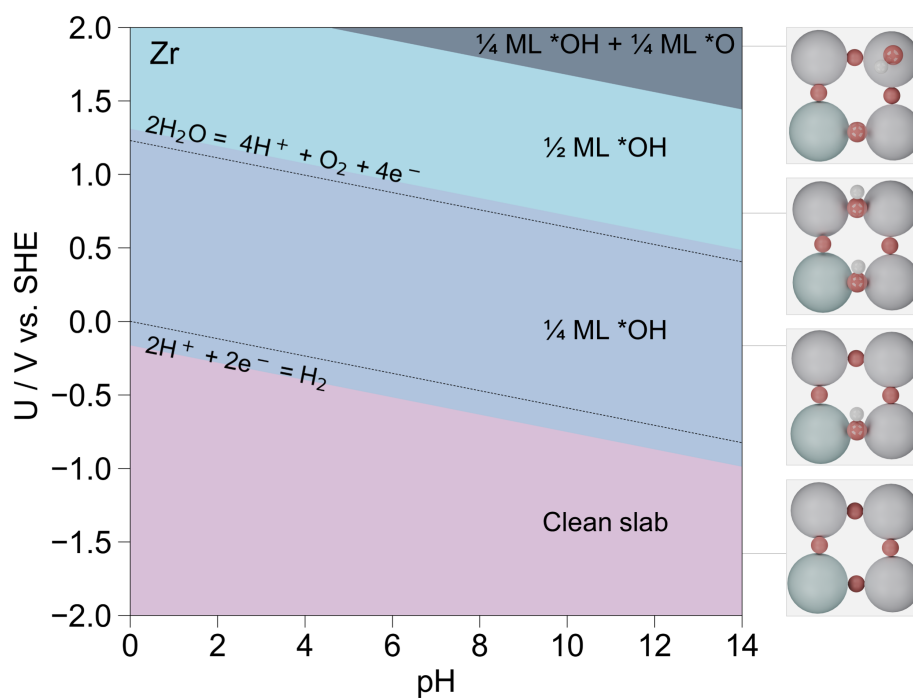

**Figure S9.** Surface Pourbaix diagram of Zr-doped Ta<sub>2</sub>O<sub>5</sub>(100)

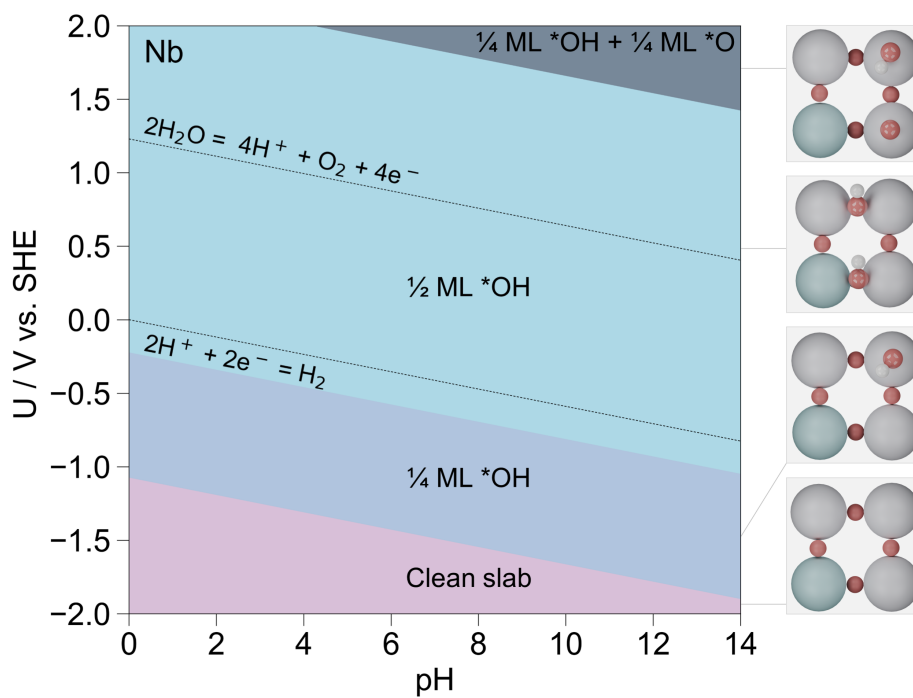

**Figure S10.** Surface Pourbaix diagram of Nb-doped Ta<sub>2</sub>O<sub>5</sub>(100)

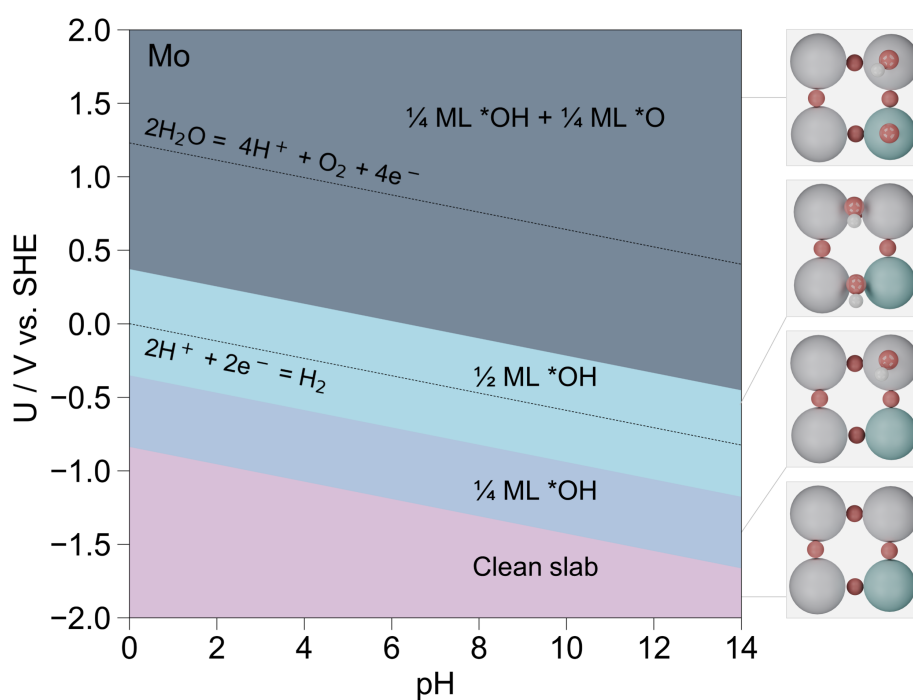

**Figure S11.** Surface Pourbaix diagram of Mo-doped Ta<sub>2</sub>O<sub>5</sub>(100)

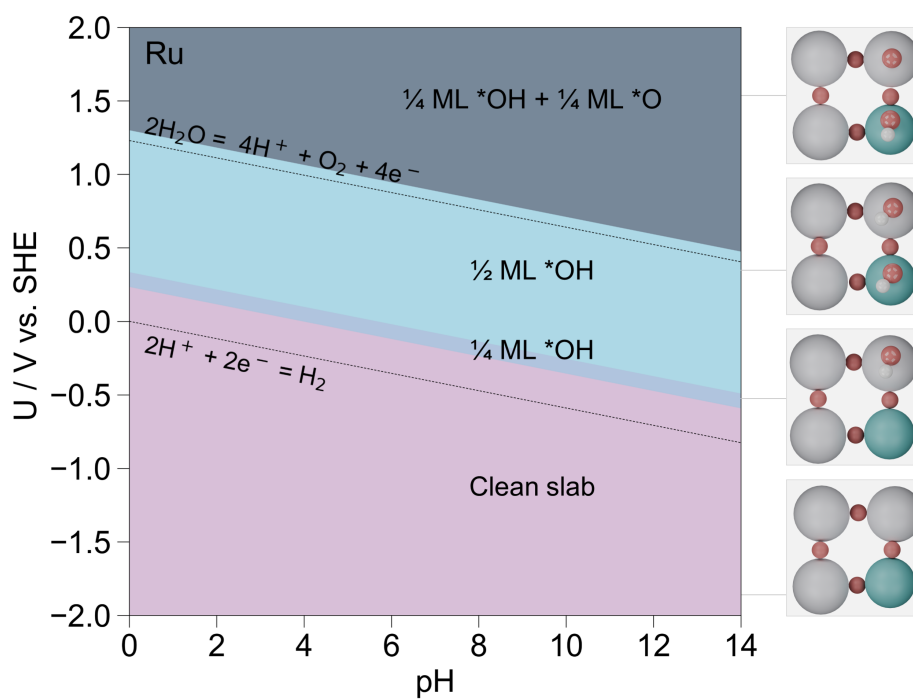

**Figure S12.** Surface Pourbaix diagram of Ru-doped Ta<sub>2</sub>O<sub>5</sub>(100)

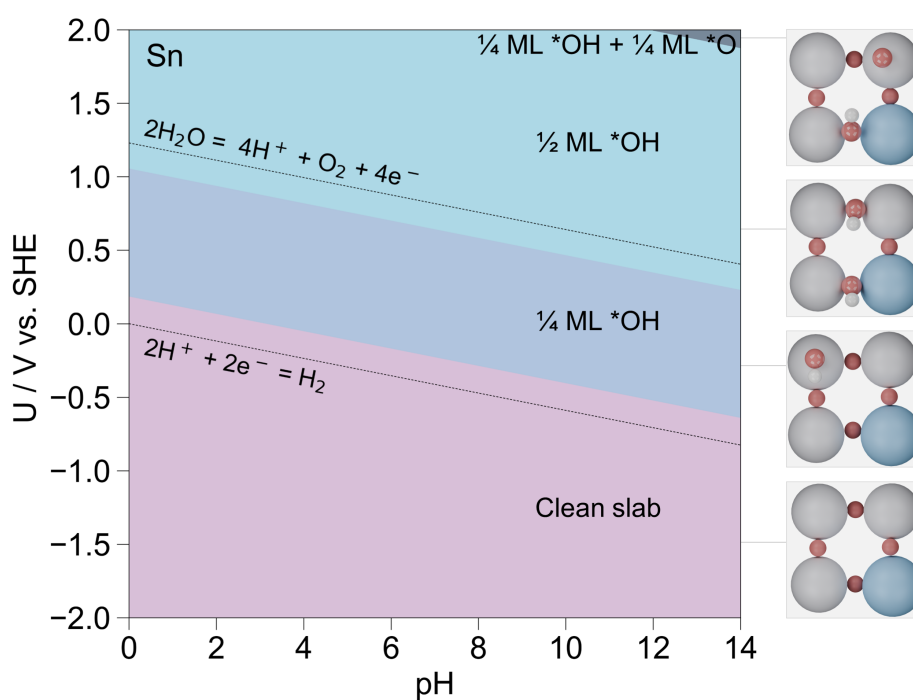

**Figure S13.** Surface Pourbaix diagram of Sn-doped Ta<sub>2</sub>O<sub>5</sub>(100)

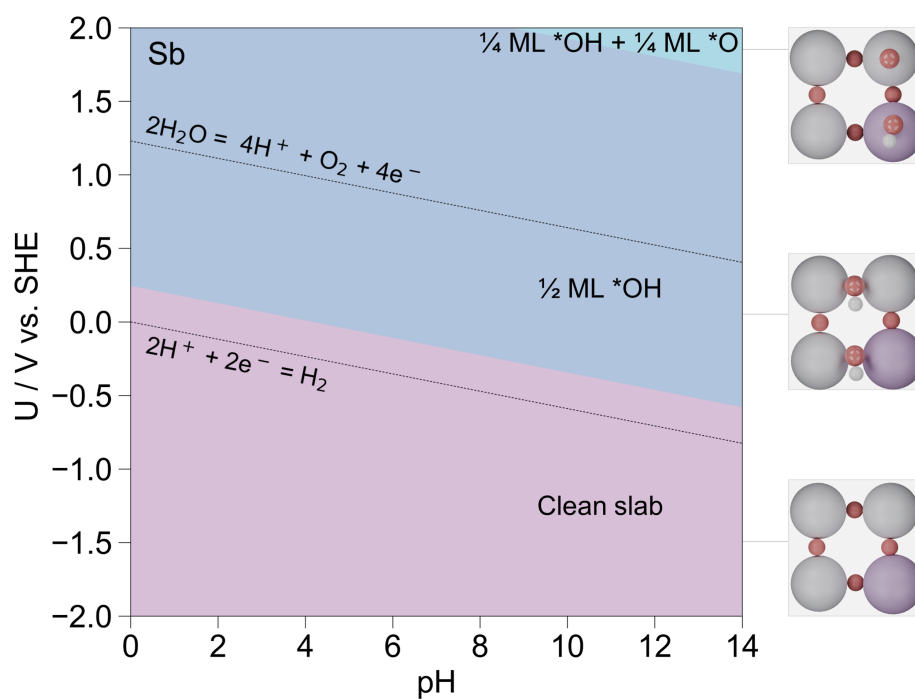

**Figure S14.** Surface Pourbaix diagram of Sb-doped Ta<sub>2</sub>O<sub>5</sub>(100)

## References

1. J. Rossmeisl, A. Logadottir and J. K. Nørskov, *Chem. Phys.*, 2005, **319**, 178-184.
2. J. Rossmeisl, Z. W. Qu, H. Zhu, G. J. Kroes and J. K. Nørskov, *J. Electroanal. Chem.*, 2007, **607**, 83-89.
3. M. Bajdich, M. García-Mota, A. Vojvodic, J. K. Nørskov and A. T. Bell, *J. Am. Chem. Soc.*, 2013, **135**, 13521-13530.
4. J. K. Nørskov, J. Rossmeisl, A. Logadottir, L. Lindqvist, J. R. Kitchin, T. Bligaard and H. Jónsson, *J. Phys. Chem. B*, 2004, **108**, 17886-17892.
5. M. López, K. S. Exner, F. Viñes and F. Illas, *Adv. Theory Simul.*, 2023, **6**, 2200217.
